# Supplementary material for: Saliva sampling in global clinical studies: the impact of low sampling volume on performance of DNA in downstream genotyping experiments
Source: PubMed Central journal article supplement (PMC3698156; doi:10.1186/1755-8794-6-20), 2013-06-10
Supplement: 1755-8794-6-20-S1.pdf [file 1755-8794-6-20-S1.pdf]

Additional Materials: Institutional Review Board/Independent Ethics Committees that approved genetics research described in "Saliva sampling in global clinical studies: The impact of low sampling volume on performance of DNA in downstream genotyping experiments\*"

Coast IRB, LLC 901 Calle Amanecer Suite 260 San Clemente, CA 92673 USA

Comité de Docencia e Investigación de la Clínica del Torax.

Comité de Docencia e Investigación de la Fundación CIDEA

Comité de Docencia e Investigación del Centro de Alergia e Inmunología

Comité de Docencia e Investigación del Centro INSARES

Comité de Docencia e Investigación del Centro Investigaciones Patológicas Respiratorias

Comité de Docencia e Investigación del Centro VITAE

Comité de Docencia e Investigación del Hospital

Comité de Docencia e Investigación del Hospital A.A Cetrángolo

Comité de Docencia e Investigación del Hospital Ramos Mejía

Comité de Docencia e Investigación del Instituto del Hospital Aeronáutico Central

Comité de Docencia e Investigación del Instituto Diagnóstico Médico Bioquímico

Comité de Docencia e Investigación del Sanatorio San José

Comité Revisional e Institucional AERI

Compass IRB, 5416 East Baseline Road, Suite 120, Mesa, AZ 85206

Copernicus Group IRB 1 Triangle Drive, Suite 100 P.O. Box 110605 RTP, NC 27709

Coriell Institute for Medical Research IRB, Control Samples acquired from NIGMS Human Genetic Cell Repository

Copernicus Group IRB, 118 MacKenan Drive, Cary, NC 27511

CPP Sud Méditerranée III Faculté de médecine Avenue Kennedy CS 8302130908 NIMES Cedex 2

Ethik-Kommission der Landesärztekammer Hessen Im Vogelsgesang 3 60488 Frankfurt am Main Germany

Ethik-Kommission des Landes Sachsen-Anhalt c/o Landesamt für Verbraucherschutz Kühnauer Str. 70 06846 Dessau Germany

Great lakes IRB, 216 N Second Street, PO Box 182, Peotone, IL 60468

Harrison Institutional Review Board 16B South Main Street London, OH 43140

Health Sciences IRB, University of Wisconsin, Madison, VA Hospital, RM B3088, 2500 Overlook Terrace, Madison, WI 53705

Institutional Review Board, Faculty of Medicine Ramathibodi Hospital, Mahidol University, 270 Rama 6 Road, Bangkok 10400 Thailand

Khon Kaen University Ethics Committee for Human Research 123 Mitraphap Road Dean's Office 6th Floor Faculty of Medicine Khon Kaen University, Khon Kaen 10400 Thailand

Komisja Bioetyczna Uniwersytetu Medycznego w Białymstoku ul. Jana Kilinskiego 1 15 - 089 Białystok Poland

Institutional Review Board Faculty of Medicine Chulalongkorn University 1873 Rama 4 Road Patumwan, Bangkok 10330 Thailand

Louisiana State University Health Science Center-Shreveport Institutional Review Board, 1501 Kings Highway, Shreveport, LA 71103

Mary Mediatrix Medical Center

METC Postbus 1350 5602 ZA Eindhoven

National Jewish Medical and Research Center Institutional Review Board 1400 Jackson Street Denver, CO 80206

Optimum ERB 231 King Street East Oshawa, Ontario L1H 1C5

Partners Human Research Committee, 116 Huntington Avenue Suite 1002 Boston, MA 02116

Pharma Ethics Committee, 123 Amcor Road, Lyttelton Manor, 0157

Regional Komitè for medisinsk og helsefaglig forskningsetikk, Helseregion Midt-Norge, Medisinsk teknisk forskningscenter, 7489 Trondheim Norway

Research and Ethics Committee of Veterans Memorial Medical Center

\*Individual Institutional Review Board/Independent Ethics Committees may have approved genetics research in the clinical studies at more than one clinical site.

Additional Materials: Institutional Review Board/Independent Ethics Committees that approved genetics research described in "Saliva sampling in global clinical studies: The impact of low sampling volume on performance of DNA in downstream genotyping experiments\*"

---

Research Ethics Committee Faculty of Medicine, Siriraj Hospital, Mahidol University, 2 Prannok Road, Adulyadejvikrom Building, 10th floor, Bangkoknoi, Bangkok 10700 Thailand

Saint Joseph Mercy Health System Clinical Research Committee 5301 East Huron River Drive P.O. Box 995 Ann Arbor, MI 48106-0995

Schulmann Associates IRB Inc., 4290 Glendale Milford Road, Cincinnati, OH 45242

Southampton and South West Hampshire REC A, First Floor, Regents Park Surgery, Park Street, Shirley, Southampton, SO16 4RJ

St. Francis Hospital & Medical Center IRB 114 Woodland Street Hartford, CT 06105

Sterling IRB 6300 Powers Ferry Road Suite 600-351, Atlanta, GA 30339

STL De La Salle Medical Center

The Ethical Committee on Research Involving Human Subjects, Faculty of Medicine, Siriraj Hospital, Mahidol University, 2 Prannok Road, Adulyadejvikrom Building 10th floor, Bangkoknoi, Bangkok 10700 Thailand

The IRB/EB at the Philippine General Hospital, University of the Philippines, Metro Manila, Philippines

The University of Chicago Institutional Review Board Office of Research Services Section of Regulatory Compliance McGiffert Hall, 2nd Floor 5751 S. Woodlawn Ave. Chicago, IL 60637

The University of Chicago IRB, 5841 S. Maryland Avenue, AMB-S138 MC 1108 Chicago, IL 60637

UCLA Office for Protection of Research Subjects 11000 Kinross Avenue, Suite 102 Box 951694 Los Angeles, CA 90095

University Hospitals of Cleveland Research Institute 11100 Euclide Avenue Lakeside Bldg., Room 1400 Cleveland, OH 44106

University of Cape Town, Research Ethics Committee, Faculty of Health Sciences, Room E53-24, Groote Schuur Hospital, Old Main Building, Observatory, 7925

University of South Florida IRB, 12901 Bruce B. Downs Blvd. MDC 035, Tampa, FL 33612-4799

University of Stellenbosch Committee for Clinical Trials, Faculty of Health Sciences, Suite 5006, 5th Floor, Fransie van Zijl Drive, Parow, 7500

Wake Forest University Health Board, The Office of Research and Development, Medical Center Blvd. Winston-Salem, NC 27157

Wake Forest University Health Sciences IRB, School of Medicine, Bowman Gray Campus, Medical Center Blvd. Winston-Salem, NC 27157-1023.

Washington University School of Medicine 660 S. Euclid Ave. St. Louis, MO 63110

Wayne State University Human Investigation Committee, 4201 St. Antoine Blvd. UHC-8G, Detroit, MI 48201

Western IRB 3535 Seventh Avenue, SW Olympia, WA 98502-5010

---

\*Individual Institutional Review Board/Independent Ethics Committees may have approved genetics research in the clinical studies at more than one clinical site.
